# Supplementary material
Source: Research Square preprint supplement (doi:10.21203/rs.3.rs-10217873/v1)
Supplement: Supplementary file 1 [file fbe8ed876706a43101c3d154.docx]

**Supplementary File**

**Study Questionnaire**

**Study title**

*Under-reporting of Needlestick Injuries Among Doctors in Teaching Hospitals in Sudan: A Cross-Sectional Study*

This anonymous survey assesses the prevalence of needlestick and sharps injuries among Sudanese doctors at teaching hospitals and aims to identify obstacles to reporting such injuries. Your honest responses will provide vital insights to improve safety measures and protect medical staff. The survey takes approximately 10 minutes to complete, is confidential, and collects no personal identifying data. It also addresses the underreporting of needlestick injuries in order to strengthen safety protocols. Participation is voluntary and anonymous, and findings will guide hospital policy updates and safety systems.

## **Consent to Participate**

By completing this questionnaire, the participant confirms that they have read and understood the study information, understand the purpose of the study and confidentiality procedures, and voluntarily agree to participate. Participation is anonymous, voluntary, and may be discontinued at any time without consequences.

☐ I confirm my consent to participate.

## **Section 1. Demographic Characteristics**

1. **Age (years):**

________________________

1. **Gender:**

☐ Male

☐ Female

☐ Prefer not to say

1. **Professional role:**

☐ Consultant

☐ Specialist

☐ Registrar

☐ General practitioner

☐ House officer

1. **Primary department/specialty:**

☐ Surgery

☐ Internal medicine

☐ Pediatrics

☐ Obstetrics and gynecology

☐ Orthopedics

☐ Anesthesia

☐ Emergency medicine

________________________ *Other (please specify):*

1. **Primary teaching hospital:**

☐ Wad Madani Teaching Hospital

☐ Al Qadarif Teaching Hospital

☐ Kassala Teaching Hospital

☐ Al Manaqil Teaching Hospital

☐ Port Sudan Teaching Hospital

☐ Sinnar Teaching Hospital

☐ Sinjah Teaching Hospital

1. **Years of experience:**

________________________

1. **Hepatitis B vaccination status:**

☐ Not vaccinated

☐ Complete (3 doses)

☐ Incomplete

☐ Don’t know/do not remember

## **Section 2. Reporting System Awareness**

1. **Are you aware of any established needlestick injury reporting system/process in your hospital?**

☐ Yes

☐ No

☐ I don't know

1. **If yes, how accessible is the reporting system/process?**

☐ Very difficult

☐ Difficult

☐ Neutral

☐ Easy

☐ Very easy

## **Section 3. Needlestick Injury Prevalence and Characteristics**

1. **Have you had a needlestick injury in the past 12 months?**

☐ Yes

☐ No

***If yes, continue to Questions 11–16. If no, skip to Question 17.***

1. **How many needlestick injuries have you had in the past 12 months?**

________________________

1. **For your most recent needlestick injury, what was the mode of injury?**

☐ Syringe

☐ Intravenous cannula

☐ Suture

☐ Scalpel

________________________ *Other (please specify):*

1. **At what stage of the procedure did your most recent needlestick injury occur?**

☐ During usage/application

☐ During recapping

☐ During disposal

☐ During passing tools

________________________ *Other (please specify):*

1. **For your most recent needlestick injury, what was the infectious status of the source patient, if known?**

☐ Hepatitis B virus positive

☐ Hepatitis C virus positive

☐ Human immunodeficiency virus positive

☐ Negative

☐ Unknown

1. **Which post-exposure protocols were implemented?** *(Select all that apply)*

☐ Doctor evaluation

☐ Blood tests performed (HBV/HCV/HIV)

☐ Source patient tested

☐ Post-exposure prophylaxis

☐ Follow-up appointments

☐ No action was taken

________________________ *Other (please specify):*

1. **If other post-exposure protocols were implemented, please specify:**

________________________

## **Section 4. Barriers to Reporting**

1. **Please indicate your level of agreement with the following statements about reasons doctors fail to report needlestick injuries.**

*Scale: 1 = Strongly disagree, 2 = Disagree, 3 = Neutral, 4 = Agree, 5 = Strongly agree.*

| **Barrier item** | **1** | **2** | **3** | **4** | **5** |
| --- | --- | --- | --- | --- | --- |
| Too busy |  |  |  |  |  |
| Embarrassed |  |  |  |  |  |
| Did not know I must report |  |  |  |  |  |
| Did not know how to report |  |  |  |  |  |
| Thought it was not important |  |  |  |  |  |
| Feared job/career impact |  |  |  |  |  |
| Thought nothing would happen. |  |  |  |  |  |
| Process too complicated |  |  |  |  |  |
| Reporting staff/office unavailable |  |  |  |  |  |
| Thought risk was too low. |  |  |  |  |  |
| Already vaccinated, no need to report |  |  |  |  |  |

1. **In your professional opinion, what was the primary contributing factor leading to the underreporting of needlestick injuries?**

☐ Too busy

☐ Embarrassed

☐ Did not know I must report

☐ Did not know how to report

☐ Thought it was not important

☐ Feared job/career impact

☐ Thought nothing would happen

☐ Process too complicated

☐ Reporting staff/office unavailable

☐ Thought risk was too low

☐ Already vaccinated, no need to report

## **Section 5. Knowledge**

1. **Needlestick injuries are capable of transmitting bloodborne pathogens, including hepatitis B virus, hepatitis C virus, and human immunodeficiency virus.**

☐ True

☐ False

☐ Don’t know

1. **There is currently an effective vaccine available to prevent hepatitis C virus.**

☐ True

☐ False

☐ Don’t know

1. **Following a needlestick injury, the source patient must be tested for bloodborne viruses whenever possible.**

☐ True

☐ False

☐ Don’t know

1. **What is the standard post-exposure prophylaxis protocol for an HIV exposure?**

☐ One antiretroviral drug

☐ Combination of three antiretroviral drugs

☐ Don’t know

1. **What is the standard post-exposure prophylaxis protocol for an HBV exposure in an unvaccinated individual?**

☐ Vaccine

☐ Vaccine + immunoglobulin

☐ Immunoglobulin

☐ Don’t know
